# Supplementary material
Source: PubMed Central journal article supplement (PMC2785299)
Supplement: 0907896106_0907896106SI.pdf [file 0907896106_0907896106SI.pdf]

# Supporting Information

Yoshida et al. 10.1073/pnas.0907896106

## SI Text

**Cover Caption.** The spikelet of rice (*O. sativa*) forms a unique organ, sterile lemma, between a floret and two rudimentary glumes. A mutation in *G1* causes homeotic transformation of the sterile lemma into the lemma. *G1* encodes a land plant-specific

protein containing an uncharacterized domain, named ALOG. Yoshida et al. suggest that *G1* may have been involved in morphological modification of the spikelet during the evolution of rice.

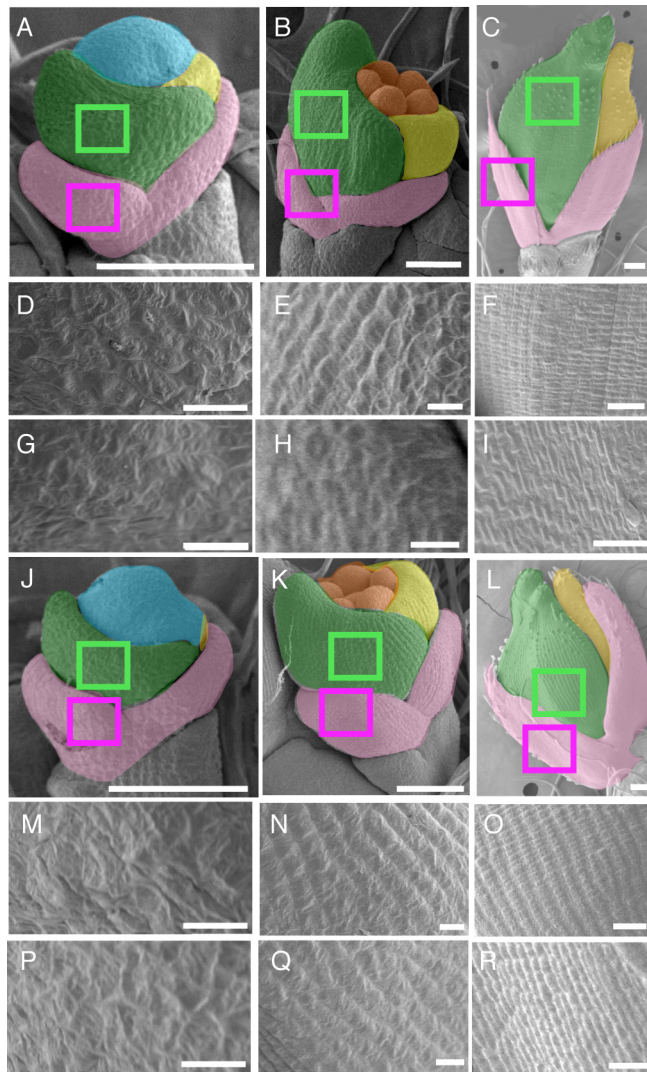

**Fig. S1.** Spikelet development in WT (A–I) and *g1* (J–R). (A–C, J–L) Developmental patterns of spikelets in WT and *g1*. Each organ is indicated by color: blue, floral meristem; orange stamen; yellow, palea; green lemma; pink, sterile lemma in WT and LSL in *g1*. (D–F, M–O) Epidermal surface of the lemma in WT (D–F) and *g1* (M–O). (G–I) Epidermal surface of the sterile lemma in WT. (P–R) Epidermal surface of the LSL in *g1*. (Scale bars: 100  $\mu\text{m}$  in A–C and J–L; 10  $\mu\text{m}$  in D–I and M–R.)

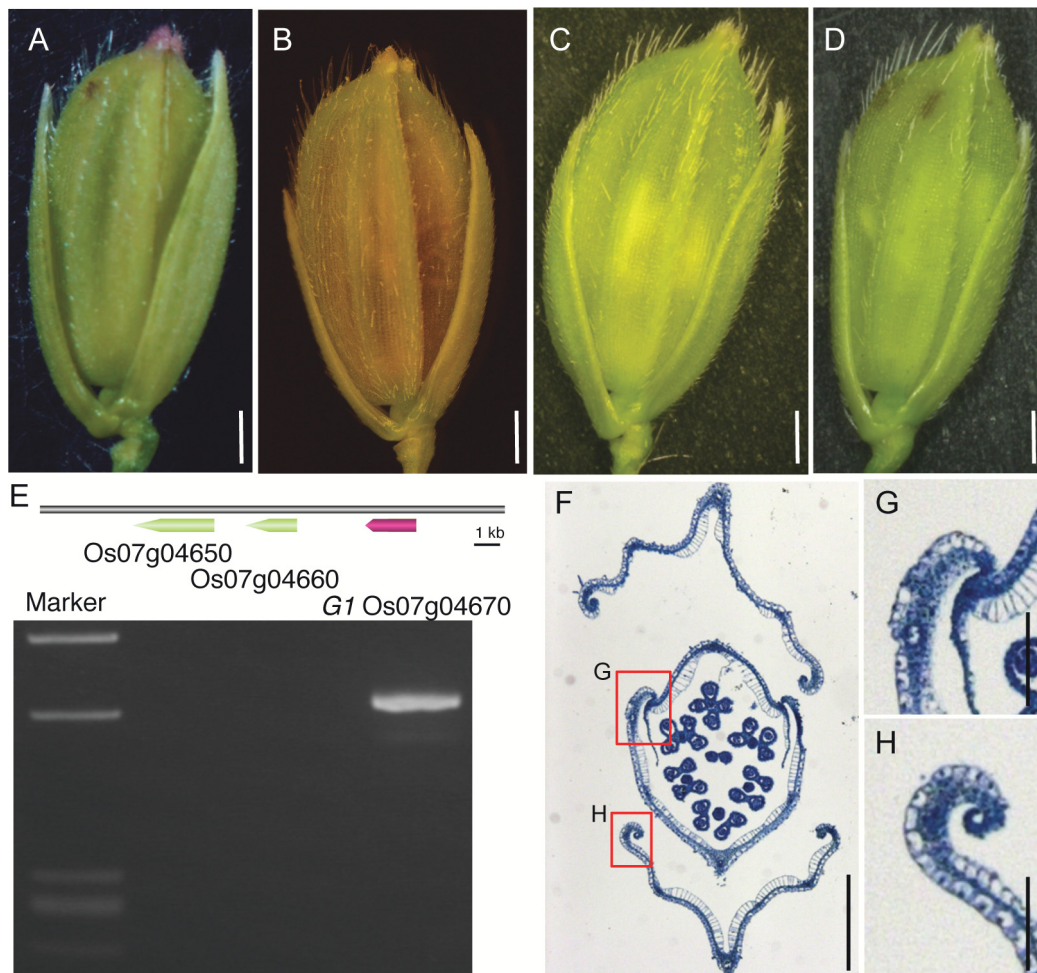

**Fig. S2.** Phenotypes of spikelets in *g1* mutants and *O. grandiglumis*. (A–D) Spikelet phenotypes of *g1-1*, *g1-2*, *g1-3*, and *g1-4*. (E) RT-PCR analysis of *G1* mRNA in young inflorescence. Among the three genes in the 12-kb deletion (Fig. 2A), only *Os07g04670* is expressed in developing spikelets. (F–H) Cross-section of the spikelets of *O. grandiglumis*. A spikelet (F) and close-up views of marginal region of the lemma/plea (G) and LSL (H) are shown. (Scale bars: 1 mm in A–D; 500  $\mu$ m in F; 100  $\mu$ m in G and H.)

AGACGCATTCTGTACGTCTCTCTAGTGTTACTGCGTAACGTAGGTGGCCGCTGCCGGCC

ATGTCGTCGTCGTCGCCGCTGCCGCGCTGGGCTCCGACGACGGCTGCTCGCCGGCGGAGCTG 20  
M S S S S A A A L G S D D G C S P A E L

CGGCCGAGCCGGTACGAGTCGAGAAGCGCCGGGACTGGCAGACCTTCACGCAGTACCTC 40  
R P S R Y E S Q K R R D W Q T F T Q Y L

GCCGCGCACCGCCCGCCTCGAGCTCCGCGCTGCAGCGGCCACGTCCTCGAGTTC 60  
A A H R P P L E L R R C S G A H V L E F

CTCCGCTACCTCGACCGTTCGGCAAGACGCGCTCCACGAGCCCGCTGCCGTCGTAC 80  
L R Y L D R F G K T R V H E P P C P S Y

GGCGGTCGCTCGCCGTCGCCGCGCCGGTCCGCGCCGCCGCGCCGATGCCAGTGC 100  
G G R S P S A A G P V A A A A A A C Q C  
T (g1-2, g1-3)

CCGCTGCGCCAGGCGTGGGGCAGCCTCGACGCGCTCGTCGGCCGCTCCGCGCCGCTAC 120  
P L R Q A W G S L D A L V G R L R A A Y  
A (g1-2)  
T (g1-3)

GACGAGCGTCACGGCCGCGCCGGGAGCCCGACGCGCTCGCGGGCGCCGGCGCGTCCGCC 140  
D E R H G R A G E P D A V A G A G A V A

ACCGACAGTACCTCCTCCTCCTCCGCCCGCCGCCAACCCCTTCGCCGCGCGCCGCTG 160  
T D S T S S S S A A A A N P F A A R A V

AGGCTGTACCTGCGCGACGTCCGCGACGCGCAGGCCATGGCGCGCGGATCTCCTATCAC 180  
R L Y L R D V R D A Q A M A R G I S Y H

AAGAAGAAGAAGCGCAGGGGCGGAACATGAACGGCGCCCGCGGGCGGGCGGGCGGGCGGG 200  
K K K K R R G G N M N G A R G G G G G G

GCCGCGCGGGCGTGAACGACGGCGATGCGACGGCGCCCGGTGGCGGTGACCCCGGGG 220  
A R A G V N D G D A T A P P V A V T P G  
deletion (g1-4)

CTACCTCTGCCCGCGTCCACCGTGCCTCAACGGTGTGCCGTTTCGAGTACTGCGACTTC 240  
L P L P P L P P C L N G V P F E Y C D F

GGGAGCGTCTCGGGGAGCACATGGCGCCATGGCGGCCATGGCGGGCGGGCGGGCGGG 260  
G S V L G G A H G A H G G H G G G G G G

TTCTACGGCGCCGGCTACTTGCATTTCTGTACAACACCTTCAGTTAGTTAGCTAGC 276  
F Y G A G V Y L P F L Y N T F S

TAGCTAGTTCGTCGTGATTTGCTGTGCTTCTCACTGTGGTTGCTTCAGTGTACTAGCT

AGCTACATGTGTGATGTGCTGCATCTTGATCATCTTGATCTGTGCTTTGATGCTGAT

Fig. S3. DNA and protein sequences of rice G1. Blue and red boxes indicate the ALOG domain and nuclear localization signal, respectively. Thick lines indicate amino acid insertions in the ALOG domain. Underline indicates the region used for in situ probe. Mutations in the *g1* alleles are shown in orange.



|             |   |                                                                                |    |
|-------------|---|--------------------------------------------------------------------------------|----|
| OsG1        | 1 | SRYESQKRRDWTFTQYLAHRPPLLELRCSGAHVLEFLRYLDRFGKTRVHEPPCPSYGGRSPSAAGPVAANAACQCP   | 80 |
| ZmG1        | 1 | SRYESQKRRDWTFTQYLAHRPPLLELRCSGAHVLEFLRYLDRFGKTRVHAPSAAAYGGGGGRPVE---AAVACQCP   | 77 |
| SbG1        | 1 | SRYESQKRRDWTFTQYLAHRPPLLELRCSGAHVLEFLRYLDRFGKTRVHAPLCAAYGGGGGPPALV---AAPCQCP   | 77 |
| BdG1        | 1 | SRYESQKRRDWTFTQYLAHRPPLLELRCSGAHVLEFLRYLDRFGKTRVHHPHCPYGGAAALSSSTANT-HFHPCCQCP | 79 |
| OsG1L1      | 1 | SRYESQKRRDWTFTQYLRNHRPPLLELRCSGAHVLEFLRYLDQFGKTKVHAHGCPFFGHPS-----PPAPCP       | 71 |
| OsG1L2      | 1 | SRYESQKRRDWTFTQYLRNHRPPLLELRCSGAHVLEFLRYLDQFGKTKVHAAGCPFFGHPS-----PPAPCP       | 71 |
| OsG1L3      | 1 | SRYEAQKRRDWTFTQYLRNHRPPLLELRCSGAHVLEFLRYLDQFGKTKVHTAACPFPHGN-----PPAPCP        | 71 |
| OsG1L4      | 1 | SRYEAQKRRDWTFTQYLRNHRPPLLELRCSGAHVLEFLRYLDQFGKTKVHTAACPFPHGN-----PPAPCP        | 71 |
| OsG1L5      | 1 | SRYESQKRRDWTFTQYLRNHRPPLLELRCSGAHVLEFLRYLDQFGKTKVHAPACPFPHGPA-----PPAPCP       | 71 |
| OsG1L6      | 1 | SRYESQKRRDWTFTQYLRNHRPPLLELRCSGAHVLEFLRYLDQFGKTKVHTVPCPFYGHPN-----PPAPCP       | 71 |
| OsG1L7      | 1 | SRYESQKRRDWTFTQYLRNHRPPLLELRCSGAHVLEFLRYLDQFGKTKVHASCAYFGQPS-----PPGPCP        | 71 |
| OsG1L8      | 1 | SRYESQKRRDWTFTQYLRNHRPPLLELRCSGAHVLEFLRYLDQFGKTKVHASCAYYQPS-----PPAPCP         | 71 |
| OsG1L9      | 1 | SRYESQKRRDWTFTQYLRNHRPPLLELRCSGAHVLEFLRYLDQFGKTKVHADGCAFYGEPN-----PPAPCP       | 71 |
| AtLHS1      | 1 | SRYENQKRRDWTFTQYLRNHRPPLLELRCSGAHVLEFLRYLDQFGKTKVHQNCAFFGLPN-----PPAPCP        | 71 |
| AtLHS2      | 1 | SRYENQKRRDWTFTQYLRNHRPPLLELRCSGAHVLEFLRYLDQFGKTKVHQNCAFFGLPN-----PPAPCP        | 71 |
| AtLHS3      | 1 | SRYENQKRRDWTFTQYLRNHRPPLLELRCSGAHVLEFLRYLDQFGKTKVHTNICHFYGHPN-----PPAPCP       | 71 |
| AtLHS4      | 1 | SRYENQKRRDWTFTQYLRNHRPPLLELRCSGAHVLEFLRYLDQFGKTKVHTLCPFFGHPN-----PPAPCP        | 71 |
| AtLHS5      | 1 | SRYESQKRRDWTFTQYLRNHRPPLLELRCSGAHVLEFLRYLDQFGKTKVHATACPFPHGPN-----PPSQC        | 71 |
| AtLHS6      | 1 | SRYESQKRRDWTFTQYLRNHRPPLLELRCSGAHVLEFLRYLDQFGKTKVHVAACPFGHQ-----PPS            | 71 |
| AtLHS7      | 1 | SRYESQKRRDWTFTQYLRNHRPPLLELRCSGAHVLEFLRYLDQFGKTKVHIHGCVFFGQVE-----PAG          | 71 |
| AtLHS8      | 1 | SRYESQKRRDWTFTQYLRNHRPPLLELRCSGAHVLEFLRYLDQFGKTKVHIQGCVFFGQKE-----PPG          | 71 |
| AtLHS9      | 1 | SRYESQKRRDWTFTQYLRNHRPPLLELRCSGAHVLEFLRYLDQFGKTKVHHQACVFFGQPD-----PPG          | 71 |
| AtLHS10     | 1 | SRYESQKRRDWTFTQYLRNHRPPLLELRCSGAHVLEFLRYLDQFGKTKVHVPFCMFGQPE-----PPAP          | 71 |
| Sm G1-like1 | 1 | SRYEAQKRRDWTFTQYLRNHRPPLLELRCSGAHVLEFLRYLDQFGKTKVHAPACPFPHGLAH-----PPAP        | 71 |
| Pp G1-like1 | 1 | SRYEAQKRRDWTFTQYLRNHRPPLLELRCSGAHVLEFLRYLDQFGKTKVHVPFCMFGQPE-----PPHP          | 71 |

|             |    |                                                                               |     |
|-------------|----|-------------------------------------------------------------------------------|-----|
| OsG1        | 81 | QOAWGSLDALVGRRAAYDERHGRAGEPDVAVAGAVATDSTSSSSA-AAANPFAARAVRLYLDRVDRDAQAMARGISY | 157 |
| ZmG1        | 78 | QOAWGSLDALVGRRAAYFEERHGARG---IWTSSQPDGGVGVGGGGGANPFAARAVRLYLDRVDRDAQSRARGISY  | 152 |
| SbG1        | 78 | QOAWGSLDALVGRRAAYFEERHGARGSGTIWTSSQSQSQPQAVVDGDAANPFAARAVRLYLDRVDRDAQSRARGISY | 155 |
| BdG1        | 80 | QOAWGSLDALVGRRAAYFADNDNDNNK-----ASINPFAARAVRLYLDRVDRDQSRARGISY                | 136 |
| OsG1L1      | 72 | QOAWGSLDALVGRRAAYFEEHGGR-----PESNPFGARAVRLYLDRVDRDQSRARGISY                   | 125 |
| OsG1L2      | 72 | QOAWGSLDALVGRRAAYFEEHGGR-----PEANPFGARAVRLYLREVDRDQSRARGISY                   | 125 |
| OsG1L3      | 72 | QOAWGSLDALVGRRAAYFEENGGR-----PESNPFARAVRLYLREVREHQARARGVSY                    | 125 |
| OsG1L4      | 72 | QOAWGSLDALVGRRAAYFEENGGR-----PESNPFARAVRLYLREVREHQARARGVSY                    | 125 |
| OsG1L5      | 72 | QOAWGSLDALVGRRAAYFEENGGR-----PENPFGARAVRLYLREVREHQARARGVSY                    | 125 |
| OsG1L6      | 72 | QOAWGSLDALVGRRAAYFEENGGR-----PEMNPFGARAVRLYLREVREHQARARGVSY                   | 125 |
| OsG1L7      | 72 | QOAWGSLDALVGRRAAYFEENGGR-----PESNPFARAVRLYLREVREHQARARGVSY                    | 125 |
| OsG1L8      | 72 | QOAWGSLDALVGRRAAYFEESGHA-----PESNPFARAVRLYLREVREHQARARGVSY                    | 125 |
| OsG1L9      | 72 | QOAWGSLDALVGRRAAYFEESGGR-----PESNPFARAVRLYLREVREHQARARGVSY                    | 125 |
| AtLHS1      | 72 | QOAWGSLDALVGRRAAYFEENGPP-----PEANPFGARAVRLYLREVDRDQSRARGVSY                   | 125 |
| AtLHS2      | 72 | QOAWGSLDALVGRRAAYFEENGGA-----PETSPPGSRVRIFLREVDRDQSRARGVSY                    | 125 |
| AtLHS3      | 72 | QOAWGSLDALVGRRAAYFEENGK-----PETNPFGARAVRLYLREVDRDQSRARGVSY                    | 125 |
| AtLHS4      | 72 | QOAWGSLDALVGRRAAYFEENGGS-----PETNPFGARAVRLYLREVDRDQSRARGVSY                   | 125 |
| AtLHS5      | 72 | QOAWGSLDALVGRRAAYFEIIGGL-----PESNPFARAVRLYLREVDRDQSRARGVSY                    | 126 |
| AtLHS6      | 72 | QOAWGSLDALVGRRAAYFEENGGR-----PDSNPFARAVRLYLREVDRDQSRARGVSY                    | 125 |
| AtLHS7      | 72 | QOAWGSLDALVGRRAAYFEENGGL-----PERNPFAGGGIRVFLREVDRDQSRARGVSY                   | 125 |
| AtLHS8      | 72 | QOAWGSLDALVGRRAAYFEENGGL-----TEKNPFAGGGIRVFLREVDRDQSRARGVSY                   | 125 |
| AtLHS9      | 72 | QOAWGSLDALVGRRAAYFEHGGGS-----PDTNPFANGSIRVHLREVDRDQSRARGVSY                   | 126 |
| AtLHS10     | 72 | QOAWGSLDALVGRRAAYFEENGPP-----PETNPFASGATRVYLREVDRDQSRARGVSY                   | 125 |
| Sm G1-like1 | 72 | QOAWGSLDALVGRRAAYFEEHGGR-----PESNPFGARAVRLYLREVREHQARARGISY                   | 125 |
| Pp G1-like1 | 72 | QOAWGSLDALVGRRAAYFEENGK-----PESNPFGARAVRLYLREVREHQARARGISY                    | 125 |

Fig. S4. Amino acid alignment in the ALOG domain. Thick red lines indicate the insertions found in protein in the G1 clade.

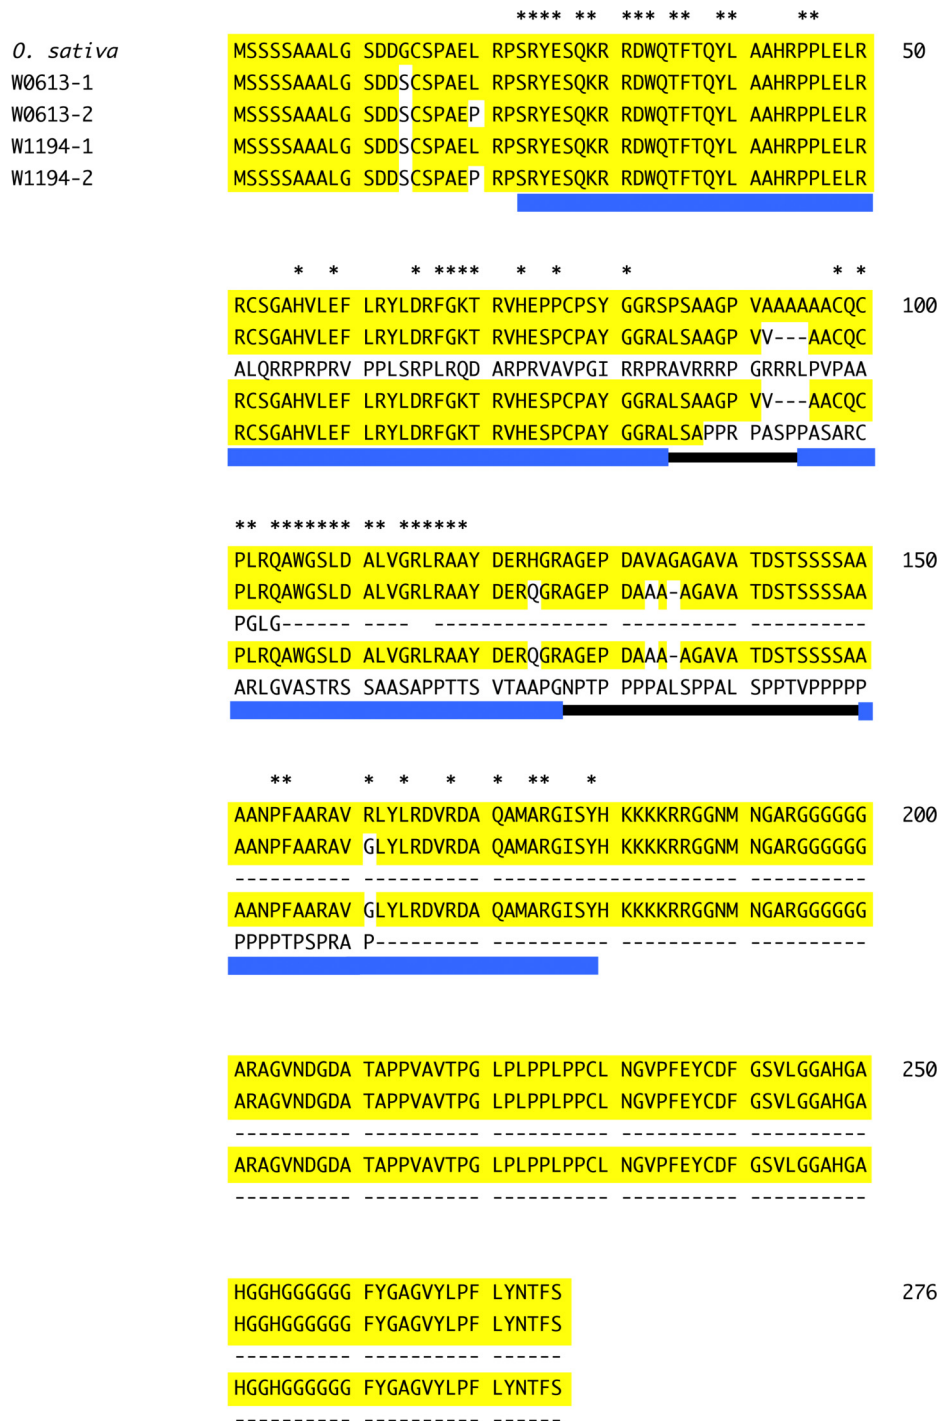

**Fig. S5.** Amino acid alignment of G1 proteins from *O. sativa* and *O. grandiglumis*. Thick blue lines indicate the ALOG domain and black lines indicate the insertions in G1 proteins. The two genomes of the tetraploid species *O. grandiglumis* (accessions, W0613 and W1194) are tentatively numbered 1 and 2.

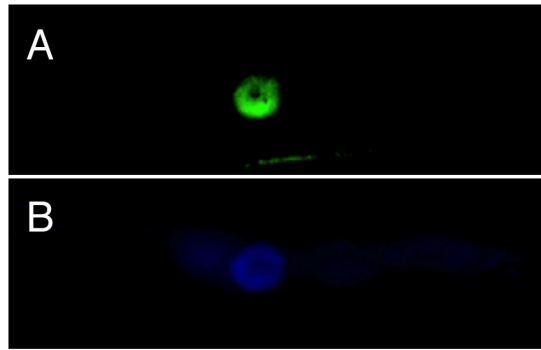

**Fig. S6.** Subcellular localization of G1. (A) GFP-G1 fusion protein. (B) DAPI staining of the nucleus.

**Table S1. Accession numbers**

| Species                  | Accession | Gene              | Accession no. |
|--------------------------|-----------|-------------------|---------------|
| <i>O. sativa</i>         | —         | <i>G1</i>         | AB512480      |
|                          | —         | <i>G1L1</i>       | AB512490      |
|                          | —         | <i>G1L2</i>       | AB512491      |
|                          | —         | <i>G1L3</i>       | AB512492      |
|                          | —         | <i>G1L4</i>       | AB512493      |
|                          | —         | <i>G1L5</i>       | AB512494      |
|                          | —         | <i>G1L6</i>       | AB512495      |
|                          | —         | <i>G1L7</i>       | AB512496      |
|                          | —         | <i>G1L8</i>       | AB512497      |
| <i>O. grandiglumis</i>   | —         | <i>G1L9</i>       | AB512498      |
|                          | W0613     | <i>OgG1-1</i>     | AB512486      |
|                          | W0613     | <i>OgG1-2</i>     | AB512487      |
|                          | W1194     | <i>OgG1-1</i>     | AB512488      |
| <i>B. distachyon</i>     | —         | <i>OgG1-2</i>     | AB512489      |
|                          | —         | <i>BdG1</i>       | AB512481      |
| <i>Z. mays</i>           | —         | <i>ZmG1</i>       | AB512482      |
| <i>S. bicolor</i>        | —         | <i>SbG1</i>       | AB512483      |
| <i>P. patens</i>         | —         | <i>PpG1-like1</i> | AB512484      |
| <i>S. moellendorffii</i> | —         | <i>SmG1-like1</i> | AB512485      |



Table S2. Primers used in this study

|                                          | Primer                                          | Marker       |
|------------------------------------------|-------------------------------------------------|--------------|
| Mapping                                  |                                                 |              |
| g1M01 d1                                 | 5'-TATCTACGTCAAAGGCAGTC-3'                      | CAPS (AfaI)  |
| g1M01 u2                                 | 5'-TTGAATGTTACGACATGCA-3'                       |              |
| g1M02 d1                                 | 5'-CATTCAATTTATTTGTACAGATCAC-3'                 | STS          |
| g1M02 u2                                 | 5'-GCATGCTCCCGGTGCATTTTC-3'                     |              |
| g1M05 d1                                 | 5'-CCTGAAACAAAATGGATGATAA-3'                    | CAPS (DraI)  |
| g1M05 u2                                 | 5'-ATGTGAATGAAAAACCTAATCC-3'                    |              |
| g1M11 d1                                 | 5'-CCTGAAACAAAATGGATGATAA-3'                    | CAPS (PstI)  |
| g1M11 u2                                 | 5'-ATTTATTTTATTATGACTTGATTTGT-3'                |              |
| g1M19 d1                                 | 5'-TGGAACAAGCCGACTGTCATACAC-3'                  | dCAPS (NdeI) |
| g1M19 u2                                 | 5'-GAGGTTCAATTTCTTTTCTTTTTCAT-3'                |              |
| g1M28 d1                                 | 5'-TGTCACATTAATATACGGACGTA-3'                   | dCAPS (AfaI) |
| g1M28 u2                                 | 5'-GATGGATTAATTAGGCTGGC-3'                      |              |
| g1M32 d1                                 | 5'-ATCGTTACGATCGGAAATTTTAA-3'                   | STS          |
| g1M32 u2                                 | 5'-TGATGGTTTAGTAGCGTTTGTAGA-3'                  |              |
| G1 cDNA amplification                    |                                                 |              |
| G1 d1                                    | 5'-ACTACCACCTTGGTTGGCTCTATTAAGGC-3'             |              |
| G1 u2                                    | 5'-CACAAAGATGCAGACACATCACACATGTAGC-3'           |              |
| In situ probe                            |                                                 |              |
| G1i d1                                   | 5'-CCGGGGAGCCCGACGCCGTCGGGGCGCCG-3'             |              |
| G1i u2                                   | 5'-CACAAAGATGCAGACACATCACACATGTAGC-3'           |              |
| Construction of G1-GFP fusion protein    |                                                 |              |
| G1 gfp d1                                | 5'-GGAATTCATGTCGTCGTCGTCGCGCTGCCG-3'            | EcoRI*       |
| G1 gfp u2                                | 5'-GGAATTCACTGAAGGTGTTGTACAGAAAT-3'             | EcoRI*       |
| Construction of G1-GAL4BD fusion protein |                                                 |              |
| G1 gal d1                                | 5'-TCCGATATCGATGTCGTCGTCGTCGCGCTGCCGCTGGGC-3'   | EcoRV*       |
| G1 gal u2                                | 5'-ACGCGTCGACCTAACTGAAGGTGTTGTACAGAAATGGCAAG-3' | Sall*        |

\*Restriction enzyme used for plasmid construction.
